# Supplementary material for: Contrasting structural complexity differentiate hunting strategy in an ambush apex predator
Source: Research Square preprint supplement (doi:10.21203/rs.3.rs-290215/v1), 2021-03-30
Supplement: Supplementary file 1 [file 3568684208f5669084d3b9d5.docx]

**Table 4.** Final model analysing pike use of pelagic habitat in both lakes

Relationship of behavioral traits (dH-KUD, dV-KS) and body length on pike use of pelagic habitat as a function of the time spent in open water (TOW)**.** The model fits a zero-one beta inflated distribution *BEINF*(μ, σ, ν, τ) defined by separate linear predictors or (penalized P-splines) smooth terms (*pb*) for all four parameters, and an additive random effect term with autocorrelation, with either a random slope-intercept (μ, σ and ν) or a random-intercept only (τ). *b*, variable estimate (z-score); *SE*, standard error; *t*, t-statistics; *p*, p-value (in bold, p-values lower than 0.05); *edf,* effective degrees of freedom of the smooth terms*;* *σb*, Random effect parameter of the smooth term; *ϓ*, smoothing parameter. Random effects were calculated as in Table 2; *GAIC*, Generalized Akaike information criterion; *GDEV,* global fitted deviance; *SBC*, Schwartz Bayesian Criterion; *pseudo-R2,* generalized pseudo R-squared.

|  | *Dependent variable:* TOW | | | | | | | | | | | | |
| --- | --- | --- | --- | --- | --- | --- | --- | --- | --- | --- | --- | --- | --- |
|  |
| **Parameter** | **Variable** | **b** | **SE** | **t** | ***p*** | ***edf*** | **σb** | **ϓ** | **σ2** | **τ00 tag_id** | **τ11 tag_id.time** | **ρ01 tag_id** | ***R*** |
|  |  |  |  |  |  |  |  |  |  |  |  |  |  |
| ***μ* (logit)** | (Intercept) | -1.633 | 0.063 | -26.08 | **< 0.001** |  |  |  |  |  |  |  |  |
| pb(Time) | 0.003 | 0.001 | 4.05 | **< 0.001** | 10.48 | 0.16 | 15.14 |  |  |  |  |  |
| Lake[LSC] | 0.756 | 0.095 | 7.99 | **< 0.001** |  |  |  |  |  |  |  |  |
| pb(dH-KUD) | 0.738 | 0.027 | 27.10 | **< 0.001** | 6.19 | 0.05 | 180.92 |  |  |  |  |  |
| pb(dV-KS) | -0.225 | 0.024 | -9.54 | **< 0.001** | 15.42 | 0.55 | 1.34 |  |  |  |  |  |
| pb(Time) × Lake[LSC] | -0.006 | 0.001 | -4.74 | **< 0.001** |  |  |  |  |  |  |  |  |
|  | ***Random effects*** |  |  |  |  |  |  |  | 0.412 | 0.843 | 6.52-05 | -0.534 | 0.672 |
|  |  |  |  |  |  |  |  |  |  |  |  |  |  |
| ***σ* (logit)** | (Intercept) | -2.043 | 0.092 | -22.11 | **< 0.001** |  |  |  |  |  |  |  |  |
| pb(Time) | 0.007 | 0.001 | 6.30 | **< 0.001** | 14.09 | 0.47 | 1.75 |  |  |  |  |  |
| Lake[LSC] | 0.987 | 0.129 | 7.70 | **< 0.001** |  |  |  |  |  |  |  |  |
| dH-KUD | 0.025 | 0.033 | 0.76 | 0.447 |  |  |  |  |  |  |  |  |
| pb(dV-KS) | -0.154 | 0.029 | -5.26 | **< 0.001** | 12.89 | 0.37 | 2.92 |  |  |  |  |  |
| pb(Time) × Lake[LSC] | -0.003 | 0.002 | -2.25 | **0.025** |  |  |  |  |  |  |  |  |
|  | ***Random effects*** |  |  |  |  |  |  |  | 0.40 | 0.630 | 2.85-05 | -0.592 | 0.612 |
|  |  |  |  |  |  |  |  |  |  |  |  |  |  |
| **ν (log)** | (Intercept) | 0.057 | 0.152 | 0.371 | 0.71 |  |  |  |  |  |  |  |  |
| pb(Time) | 0.006 | 0.002 | 3.63 | **< 0.001** | 6.06 | 0.15 | 35.99 |  |  |  |  |  |
| Lake[LSC] | -0.328 | 0.141 | -2.33 | **0.02** |  |  |  |  |  |  |  |  |
| pb(dH-KUD) | -1.578 | 0.102 | -15.50 | **< 0.001** | 4.05 | 0.08 | 113.75 |  |  |  |  |  |
| Body length | -0.173 | 0.069 | -2.51 | **0.012** |  |  |  |  |  |  |  |  |
|  | ***Random effects*** |  |  |  |  |  |  |  | 0.840 | 1.810 | 1.34-05 | -0.347 | 0.683 |
|  |  |  |  |  |  |  |  |  |  |  |  |  |  |
| **τ (log)** | (Intercept) | -9.256 | 1.729 | -5.353 | **< 0.001** |  |  |  |  |  |  |  |  |
| pb(Time) | 0.034 | 0.019 | 1.81 | 0.071 | 11.29 | 68.4 | 1.67-05 |  |  |  |  |  |
| Lake[LSC] | 2.794 | 1.118 | 2.50 | **0.013** |  |  |  |  |  |  |  |  |
|  | ***Random effects*** |  |  |  |  |  |  |  | 0.079 | 9.624 |  |  | 0.992 |
|  | **GAIC** | 172.51 |  |  |  |  |  |  |  |  |  |  |  |
|  | **GDEV** | -271.14 |  |  |  |  |  |  |  |  |  |  |  |
|  | **SBC** | 1408.86 |  |  |  |  |  |  |  |  |  |  |  |
|  | **pseudo-R2** | 0.71 |  |  |  |  |  |  |  |  |  |  |  |
