# Supplementary material for: Contrasting structural complexity differentiate hunting strategy in an ambush apex predator
Source: Research Square preprint supplement (doi:10.21203/rs.3.rs-290215/v1), 2021-03-30
Supplement: Supplementary file 1 [file e13abdd9c9200155f2e4cd05.docx]

**Table 5*.***Summary of the best model predicting pike trophic niche.

Littoral reliance LR calculated with a two-source isotopic mixing model [48] as a function of structural habitat complexity (Lake as a binary factor) and pike body length (in mm). Continuous variables are standardized to allow direct comparison of effect sizes. Standard error (SE), P-values and 95% confidence intervals (CI) for each parameter are shown.

| **Parameter** | **Estimate** | **SE** | **P** | **-95% CI** | **+95% CI** |
| --- | --- | --- | --- | --- | --- |
| Intercept | 0.658 | 0.022 | <0.001 | 0.611 | 0.705 |
| Lake | 0.157 | 0.032 | <0.002 | 0.091 | 0.224 |
| Length | -0.083 | 0.032 | 0.018 | -0.151 | -0.016 |
