# Supplementary material for: Contrasting structural complexity differentiate hunting strategy in an ambush apex predator
Source: Research Square preprint supplement (doi:10.21203/rs.3.rs-290215/v1), 2021-03-30
Supplement: Supplementary file 2 [file 40f19be8fa60948c66b897d1.docx]

**Table 6.**Model selection tables for 95% confidence sets of top candidate models predicting pike littoral reliance (LR).

LR was tested against structural habitat complexity (Lake as a binary factor) as well as pike open-water use (OWU, based on telemetry data) and body length (in mm). Parameter estimates for model terms included in the models, number of parameters (K), AIC, AIC difference from best model (ΔAIC), and Akaike weights (weights) are shown. Continuous variables are standardized to allow direct comparison of effect sizes.

| **Intercept** | **Lake** | **OWU** | **Length** | **K** | **AIC** | **ΔAIC** | **Wi** |
| --- | --- | --- | --- | --- | --- | --- | --- |
| 0.66 | + |  | -0.08 | 4 | -48.70 | 0.00 | 0.67 |
| 0.66 | + | 0.03 | -0.10 | 5 | -47.30 | 1.42 | 0.33 |
