# Supplementary material for: Contrasting structural complexity differentiate hunting strategy in an ambush apex predator
Source: Research Square preprint supplement (doi:10.21203/rs.3.rs-290215/v1), 2021-03-30
Supplement: Supplementary file 6 [file c9751fa4ff8eca7b9fd010d0.docx]

**Table 2.** Fish community sampling results from both lakes.

Gillnet sampling: density/biomass of fish per 1000 m2 of nets in benthic and pelagic habitats in years 2014 and 2015. Hydroacoustic sampling: Density of fish shoals (N shoals) and single fish detections (N single fish) per 1 km of acoustic track in June and September 2015. Data collected using vertical beaming in lake parts with bottom depth higher than 10 m. AFS stands for average fish body length (TL) of single detected fish and ND for no data.

| **Gillnets** |  | | | | | | | |
| --- | --- | --- | --- | --- | --- | --- | --- | --- |
| ***Lake*** | **HSC lake** | | | | **LSC lake** | | | |
| ***Habitat*** | **benthic** | | **pelagic** | | **benthic** | | **pelagic** | |
| ***Year*** | **2014** | **2015** | **2014** | **2015** | **2014** | **2015** | **2014** | **2015** |
| Carp  (*Cyprinus carpio*) | 0.5/2.7 | 0/0 | 0/0 | 0/0 | 0/0 | 0/0 | 0/0 | 0/0 |
| E. catfish  (*Silurus glanis*) | 0.9/2.7 | 0.9/3.2 | 0/0 | 0/0 | 0.5/2.7 | 2.3/8.6 | 0/0 | 0.3/0.7 |
| Perch  (*Perca fluviatilis*) | 134.3/7.7 | 116.7/9 | 0/0 | 0/0 | 86.1/13.6 | 107.9/9.5 | 0.7/0.1 | 5.6/1.4 |
| Pike  (*Esox lucius*) | 3.2/4 | 1.9/3.3 | 0.6/2 | 0/0 | 0/0 | 0.5/0.1 | 0/0 | 0/0 |
| Pikeperch  (*Sander lucioperca*) | 0.5/1.6 | 3.2/3.4 | 0/0 | 0.6/0.1 | 0/0 | 0/0 | 0/0 | 0/0 |
| Roach  (*Rutilus rutilus*) | 115.7/10.1 | 47.7/4.6 | 57.2/5.6 | 6.7/0.9 | 72.7/6.2 | 134.3/11.8 | 0.7/0.2 | 3.1/0.2 |
| Rudd  (*Scardinus erythroplthalmus*) | 14.8/8.4 | 11.6/2 | 2.2/0.9 | 1.1/0.7 | 4.6/0.7 | 31.5/2.2 | 5.6/0.2 | 5.2/0.5 |
| Ruffe  (*Gymnocephalus cernua)* | 32.9/0.3 | 46.8/0.6 | 0/0 | 0/0 | 131.9/2.3 | 70.8/1.3 | 0/0 | 0/0 |
| Tench  (*Tinca tinca)* | 6.9/7.4 | 5.6/5.3 | 0/0 | 0/0 | 8.8/11.4 | 12/21.8 | 0/0 | 0/0 |
| Whitefish  (*Coregonus lavaretus maraena)* | 0/0 | 0/0 | 0/0 | 0/0 | 6/2.8 | 7.9/3.2 | 9/1.5 | 3.6/1 |
| **Hydroacoustic sampling** | | | | | | | | |

|  |  | **Day** |  |  | **Night** | | |  |
| --- | --- | --- | --- | --- | --- | --- | --- | --- |
| **Lake** | **Period** | **N shoals** | **N single fish** | **AFS (cm)** | | **N single fish** | **AFS (cm)** | |
| LSCL | June 2015 | 2.2 | 1.6 | 9.0 | | 89.6 | 4.2 | |
|  | September 2015 | 0.7 | 3.9 | 10.8 | | 60.1 | 7.7 | |
| HSCL | June 2015 | ND | ND | ND | | ND | ND | |
|  | September 2015 | 0 | 0.7 | 3.7 | | 17.9 | 4.0 | |
