# Supplementary material for: Contrasting structural complexity differentiate hunting strategy in an ambush apex predator
Source: Research Square preprint supplement (doi:10.21203/rs.3.rs-290215/v1), 2021-03-30
Supplement: Supplementary file 9 [file 9fb2b5349875186b806e4052.docx]

**Table 1.**  Description of tracked pike in both study lakes

| **Lake** | **No. tagged/analyzed** | **Total Length (cm)** | | | | **Weight (kg)** | | | |
| --- | --- | --- | --- | --- | --- | --- | --- | --- | --- |
|  | **mean** | **SD** | **min** | **max** | **mean** | **SD** | **min** | **max** |
| LSC | 15/13 | 86.3 | 11.4 | 63.5 | 103.5 | 4.15 | 1.78 | 1.45 | 7.45 |
| HSC | 15/12 | 78.9 | 17.6 | 52 | 115 | 4.13 | 3.4 | 0.76 | 14.2 |
